# HDAC6 Regulates Mitochondrial Transport in Hippocampal Neurons

Sigeng Chen\*, Geoffrey C. Owens, Helen Makarenkova, David B. Edelman

The Neurosciences Institute, San Diego, California, United States of America

## Abstract

**Background:** Tubulin is a major substrate of the cytoplasmic class II histone deacetylase HDAC6. Inhibition of HDAC6 results in higher levels of acetylated tubulin and enhanced binding of the motor protein kinesin-1 to tubulin, which promotes transport of cargoes along microtubules. Microtubule-dependent intracellular trafficking may therefore be regulated by modulating the activity of HDAC6. We have shown previously that the neuromodulator serotonin increases mitochondrial movement in hippocampal neurons via the Akt-GSK3 $\beta$  signaling pathway. Here, we demonstrate a role for HDAC6 in this signaling pathway.

**Methodology/Principal Findings:** We found that the presence of tubacin, a specific HDAC6 inhibitor, dramatically enhanced mitochondrial movement in hippocampal neurons, whereas niltubacin, an inactive tubacin analog, had no effect. Compared to control cultures, higher levels of acetylated tubulin were found in neurons treated with tubacin, and more kinesin-1 was associated with mitochondria isolated from these neurons. Inhibition of GSK3 $\beta$  decreased cytoplasmic deacetylase activity and increased tubulin acetylation, whereas blockade of Akt, which phosphorylates and down-regulates GSK3 $\beta$ , increased cytoplasmic deacetylase activity and decreased tubulin acetylation. Concordantly, the administration of 5-HT, 8-OH-DPAT (a specific 5-HT<sub>1A</sub> receptor agonist), or fluoxetine (a 5-HT reuptake inhibitor) increased tubulin acetylation. GSK3 $\beta$  was found to co-localize with HDAC6 in hippocampal neurons, and inhibition of GSK3 $\beta$  resulted in decreased binding of antibody to phosphoserine-22, a potential GSK3 $\beta$  phosphorylation site in HDAC6. GSK3 $\beta$  may therefore regulate HDAC6 activity by phosphorylation.

**Conclusions/Significance:** This study demonstrates that HDAC6 plays an important role in the modulation of mitochondrial transport. The link between HDAC6 and GSK3 $\beta$ , established here, has important implications for our understanding of neurodegenerative disorders. In particular, abnormal mitochondrial transport, which has been observed in such disorders as Alzheimer's disease and Parkinson's disease, could result from the misregulation of HDAC6 by GSK3 $\beta$ . HDAC6 may therefore constitute an attractive target in the treatment of these disorders.

**Citation:** Chen S, Owens GC, Makarenkova H, Edelman DB (2010) HDAC6 Regulates Mitochondrial Transport in Hippocampal Neurons. PLoS ONE 5(5): e10848. doi:10.1371/journal.pone.0010848

**Editor:** Colin Combs, University of North Dakota, United States of America

**Received:** December 30, 2009; **Accepted:** April 26, 2010; **Published:** May 26, 2010

**Copyright:** © 2010 Chen et al. This is an open-access article distributed under the terms of the Creative Commons Attribution License, which permits unrestricted use, distribution, and reproduction in any medium, provided the original author and source are credited.

**Funding:** The work was supported by the Neurosciences Research Foundation. The Neurosciences Research Foundation did not have any role in study design and conduct of the study, the collection, analysis, and interpretation of the data, or the preparation, review, or approval of the manuscript.

**Competing Interests:** The authors have declared that no competing interests exist.

\* E-mail: schen@nsi.edu

## Introduction

Histone deacetylase 6 (HDAC6) is a predominantly cytoplasmic class II histone deacetylase that is involved in many cellular processes, including degradation of misfolded proteins, cell migration, and cell-cell interaction [1]. Tubulin is a major substrate of HDAC6; inhibition of HDAC6 can dramatically increase the acetylation of tubulin both *in vitro* and *in vivo* [2,3]. Recently, it was reported that increased tubulin acetylation in neurons could promote polarized transport of the kinesin-1 cargo protein JNK-interacting Protein 1 (JIP-1) by increasing the binding of kinesin-1 to acetylated tubulin [4]. Moreover, Dompierre *et al.* [5] found that inhibiting HDAC6 reversed the transport deficit in a Huntington's disease model by increasing the vesicular transport of Brain-Derived Neurotrophic Factor (BDNF), another kinesin-1 cargo protein. The foregoing findings suggest that microtubule acetylation and the activity of HDAC6 play important roles in regulating the trafficking of intracellular cargoes transported by

kinesin-1. Since it is known that kinesin-1 is the motor protein required for anterograde transport of mitochondria within axons [6], we hypothesized that HDAC6 also regulates mitochondrial trafficking in neurons.

Mitochondrial transport and distribution are very important for proper neuronal function [6]. Abnormal mitochondrial transport is often associated with neurodegenerative diseases, such as Alzheimer's disease, Parkinson's disease, Huntington's disease, and Lou Gehrig's disease [7,8,9]. Interestingly, reduced microtubule acetylation and intracellular transport failure are regarded as early pathogenic events in the progression of Alzheimer's disease [10,11].

In the present study, we show that specific inhibition of HDAC6 greatly enhances mitochondrial trafficking in cultured hippocampal neurons. In previous studies, we found that inhibition of Glycogen Synthase Kinase 3 $\beta$  (GSK3 $\beta$ ) promoted mitochondrial transport in hippocampal neurons [12,13]. Here, we demonstrate that inhibition of HDAC6 affects mitochondrial trafficking in a

manner similar to that of GSK3 $\beta$  inhibition. We also provide evidence that GSK3 $\beta$  may directly regulate HDAC6.

## Results

### Inhibition of HDAC6 by tubacin greatly increases mitochondrial movement

To determine whether HDAC6 activity affects mitochondrial trafficking, we applied tubacin (20  $\mu$ M), a specific HDAC6 inhibitor [14], to cultured hippocampal neurons and followed the movement of fluorescently tagged mitochondria using time-lapse fluorescence microscopy. We found that tubacin greatly enhanced mitochondrial movement, as shown by the kymographs in Fig. 1A (Movies S1, S2, S3). Both the number of moving mitochondria and the average velocity increased following tubacin treatment (Fig. 1D and G). Consistent with this finding, in neurons treated with trichostatin A (TSA, 10  $\mu$ M), a nonspecific HDAC inhibitor that has been used previously to enhance the acetylation of microtubules [4,5], there was a similar increase in mitochondrial motility (Fig. 1B, E, H and Movies S4, S5, S6). In contrast, niltubacin (20  $\mu$ M), a tubacin analog that neither inhibits HDAC6 nor enhances acetylation of microtubules [14], did not alter mitochondrial movement (Fig. 1C, F, I and Movies S7, S8, S9). Within the limits of our imaging technique, we did not observe any changes in the morphology of mitochondria following exposure to HDAC inhibitors.

### Inhibition of HDAC6 increases acetylation of tubulin and association of kinesin-1 with mitochondria in hippocampal neurons

In agreement with an earlier report using non-neuronal cells [14], Western blot analysis of acetylated tubulin in extracts from hippocampal neurons showed that treatment with tubacin (20  $\mu$ M) increased levels of acetylated tubulin (Fig. 2A, lane 2). Treatment with TSA (10  $\mu$ M) had a similar effect (Fig. 2A, lane 3) and, as expected, the administration of niltubacin (20  $\mu$ M) did not change levels of tubulin acetylation, relative to controls (Fig. 2B, lane 2). Total levels of kinesin-1B and tubulin were unaffected (Fig. 2A and B).

We postulated that the *observed* increase in mitochondrial movement resulting from HDAC6 inhibition would correlate with increased levels of acetylated tubulin and kinesin-1 associated with mitochondria. To measure both the level of acetylation of tubulin and the amount of kinesin-1 associated with mitochondria, we isolated mitochondria from hippocampal neurons that had been treated with tubacin, TSA, or niltubacin. As shown by Western blot analysis, inhibition of HDAC6 by tubacin increased the amount of kinesin-1 associated with mitochondria compared to an untreated control (Fig. 2E, lanes 1 and 2). Similarly, treatment with TSA resulted in more kinesin-1 in the mitochondrial fraction (Fig. 2E, lanes 1 and 3), whereas administration of niltubacin did not cause a significant change compared to an untreated control (Fig. 2F, lanes 1 and 2). It is likely that not all of the tubulins found in the mitochondrial fractions are associated with organelles via kinesin-1. Although we cannot completely exclude the possibility of cytoplasmic contamination, it has been shown that a significant amount of tubulin binds tightly to mitochondria via the voltage-dependent anion channel [15].

### Inhibition of GSK3 $\beta$ also increases acetylation of tubulin in hippocampal neurons

In a previous study, we found that inhibition of GSK3 $\beta$  dramatically stimulated mitochondrial movement [12]. The fact

that many substrates of GSK3 $\beta$  are cytoskeleton-related proteins [16] prompted us to investigate the effects of GSK3 $\beta$  inhibition on the acetylation of tubulin. We found that inhibiting GSK3 $\beta$  with lithium chloride (LiCl, 10 mM) resulted in both an increase in the level of acetylated tubulin and the amount of kinesin-1 associated with mitochondria (Fig. 2B, lane 3; Fig. 2F, lane 3). These results closely resemble the effects of inhibiting HDAC6 using tubacin or TSA (Fig. 2A, lanes 2 and 3; Fig. 2E, lanes 2 and 3). Using two different GSK3 $\beta$  inhibitors, we confirmed that blocking activity greatly enhanced mitochondrial movement, as shown by the kymographs presented in Fig. 3A and B (Movies S10, S11, S12, S13, S14, S15). Quantification of the number of moving mitochondria and average velocity are shown in Fig. 3C–F. In parallel cultures, inhibition of GSK3 $\beta$  led to an approximately 60% increase in the acetylation of tubulin (Fig. 3G and H). In contrast, levels of acetylated tubulin declined by approximately 40% when GSK3 $\beta$  activity was increased by inhibiting Akt activity (Fig. 3I and J). These results are consistent with the idea that the Akt-GSK3 $\beta$  signaling pathway may control mitochondrial movement in neurons by modulating acetylation of microtubules via the regulation of HDAC6.

### Inhibition of GSK3 $\beta$ decreases the activity and protein levels of HDAC6 in hippocampal neurons

HDAC6 is the only cytosolic enzyme known to cause the deacetylation of tubulin in neurons [17]. We therefore investigated whether inhibiting GSK3 $\beta$  would directly affect HDAC6 activity. Whole cell lysates of hippocampal neurons, treated for one hour with LiCl, SB216763, or an Akt inhibitor (Akt-i) were separated into cytoplasmic and nuclear fractions. Total HDAC activity was assayed in both fractions. Treatment with either of the GSK3 $\beta$  inhibitors resulted in a slight decrease of HDAC6 protein level (Fig. 4A, B). However, a marked decrease in deacetylase activity was measured in the cytoplasmic fraction, but not in the corresponding nuclear fraction (Figure 4C). In contrast, when GSK3 $\beta$  activity was elevated by inhibiting Akt (Akt inhibitor VIII, 5  $\mu$ M), the activity of HDAC6 was significantly increased (Fig. 4D), a finding that is consistent with the Western blot analysis of tubulin acetylation in hippocampal neurons shown in Figure 3I and J.

### GSK3 $\beta$ regulates HDAC6 in situ

It has been shown that HDAC6 is a phosphoprotein [18,19], but neither the kinases that are responsible for phosphorylating HDAC6 nor the effect of phosphorylation on this deacetylase have been established. Our finding, that GSK3 $\beta$  likely regulates HDAC6 activity, suggests that HDAC6 is a substrate for GSK3 $\beta$ . To test this idea, we first examined the localization of GSK3 $\beta$  and HDAC6 in neurons by immunocytochemistry (Fig. 5A–D). Images of co-immunostained hippocampal neurons acquired through confocal microscopy revealed that GSK3 $\beta$  and HDAC6 were both distributed throughout the cells (Fig. 5E and F). Moreover, immunoprecipitation experiments showed that HDAC6 and GSK3 $\beta$  were found in the same protein complex in hippocampal neurons (Fig. 5G), suggesting that HDAC6 and GSK3 $\beta$  physically interact with each other *in situ*. Various phosphorylation site prediction methods have indicated that serine-22 in murine and rat HDAC6 (corresponding to serine-21 in human HDAC6) may be phosphorylated by GSK3 $\beta$ . Further, a genome-wide phosphoprotein survey has shown that this site on HDAC6 is phosphorylated [18]. Using a commercially available antibody (Abcam, ab61058, HDAC6-phospho S22), we found that inhibiting GSK3 $\beta$  with SB216763 decreased the level of phospho S22 immunoreactivity in hippocampal neurons and concomitantly increased the number of acetylated microtubules (Fig. 5H, I). In

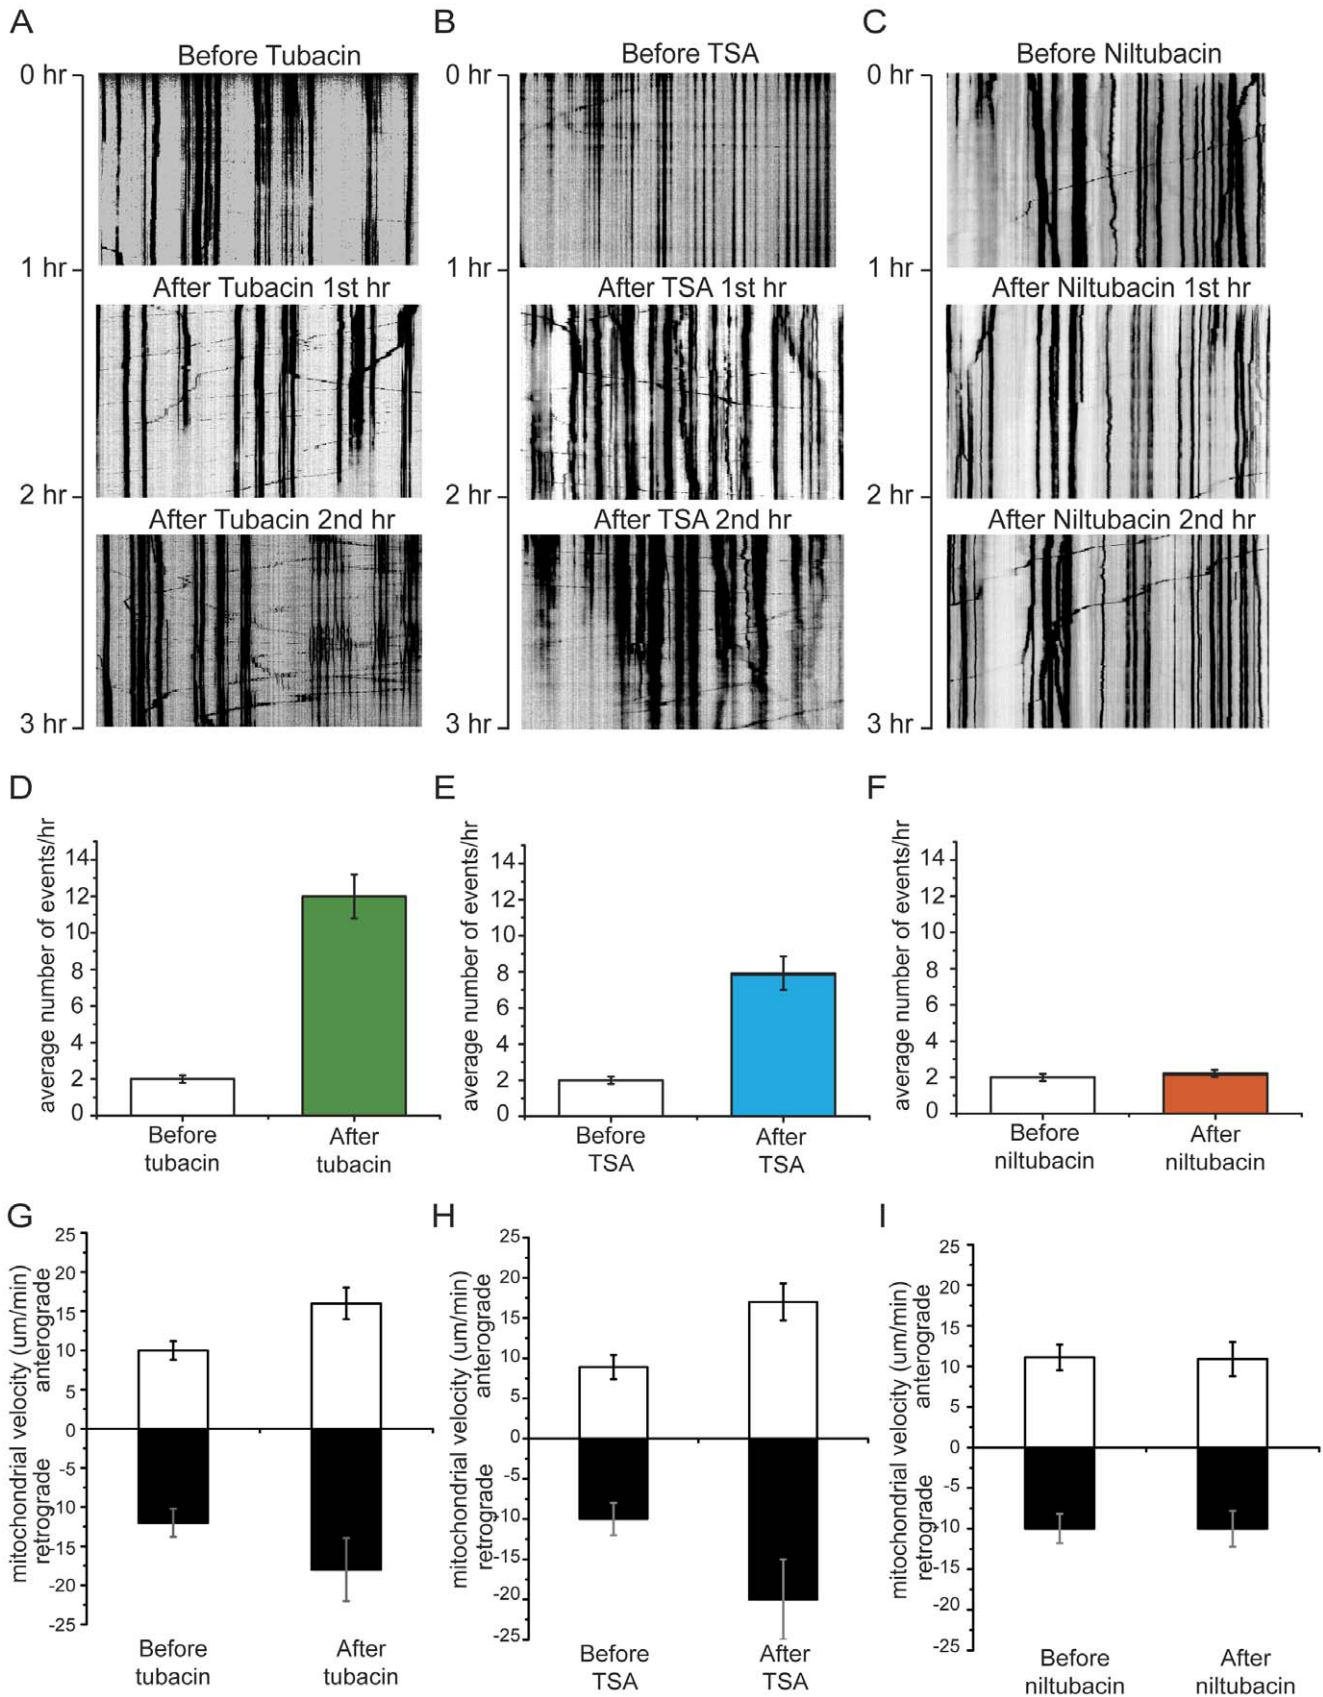

**Figure 1. Inhibition of HDAC6 by tubacin dramatically promotes mitochondrial movement in hippocampal neurons.** Kymographs (A, B and C) depicting mitochondrial motility were made from Movies S1, S2, S3, S4, S5, S6, and S7, S8, S9 respectively. In the experiment, a segment of axon was imaged continuously for 3 hours with a short break to allow for administration of drugs. Images were acquired at 10-second intervals. A. Treatment with tubacin. B. Treatment with TSA. C. Treatment with niltubacin. D, E and F. Quantification of the numbers of moving mitochondria during the period of observation (n=6). Only mitochondria that moved through the entire field of view were counted. G, H and I. Quantification of mean velocities of moving mitochondria (n=5). doi:10.1371/journal.pone.0010848.g001

contrast, inhibition of Akt resulted in increased levels of phospho S22 and decreased acetylation of microtubules (Fig. 5H–J, K–M).

### 5-HT regulates acetylation of tubulin

We reported earlier that 5-HT promotes mitochondrial transport in hippocampal neurons via the 5-HT<sub>1A</sub> receptor [12]. Our finding, that either 5-HT or 8-OH-DPAT, a 5-HT<sub>1A</sub> receptor agonist, could promote mitochondrial transport via the Akt-GSK3 $\beta$  signaling pathway [12], led us to investigate whether 5-HT might also regulate the acetylation of tubulin. Western blot analysis of acetylated tubulin showed that treatment with either 5-HT or 8-OH-DPAT, significantly increased the amount of acetylated tubulin in treated hippocampal neurons (Fig. 6A and C). Similarly, increased levels of acetylated tubulin and kinesin-1 were found in mitochondrial fractions isolated from parallel cultures that had also been treated with the same drugs (Fig. 6B and D). Fluoxetine, a selective serotonin reuptake inhibitor, also increased both the acetylation of tubulin (Fig. 6E and G) and the association of kinesin-1 with mitochondria (Fig. 6F and H). We suggest that 5-HT promotes axonal transport of mitochondria in a manner similar to that of HDAC6 inhibition.

GSK3 $\beta$  is known to phosphorylate the kinesin light chain, and inhibit axonal transport [20]. We probed lysates and purified mitochondria from 5-HT-treated and control cultures with antibodies directed against the kinesin light chains (KLC1 and KLC2). No light chains were detected in the mitochondrial fractions, suggesting that any effect of GSK3 $\beta$  on mitochondrial movement in hippocampal neurons does not involve phosphorylation of these kinesin light chains (Figure S1).

## Discussion

### Specific inhibition of HDAC6 leads to increased mitochondrial motility

Mitochondrial transport is critical for proper neuronal function [6]. Within axons, mitochondria, like other cargoes, are known to be carried along microtubules by molecular motor proteins such as kinesin and dynein [6]. However, the means by which the interaction between mitochondria and the transport machinery is regulated, and the links to particular signals that affect the movement of mitochondria are not fully understood. Recently, it was shown that acetylation of tubulin promotes the trafficking of kinesin-1 dependent cargoes such as JIP-1 and BDNF [4,5]. This was demonstrated by preventing tubulin deacetylation with tubacin, a specific HDAC6 inhibitor. In the presence of the same inhibitor, we increased acetylation of tubulin in cultured hippocampal neurons, and found that this correlated with increased rates of mitochondrial transport. Although it remains unclear how the acetylation of tubulin enhances the movement of cargoes on microtubules, there is evidence that acetylation increases the interaction between tubulin and such motor proteins as kinesin-1 and dynein [4,5,21]. It is possible that acetylated microtubules act as higher-affinity tracks for mitochondrial movement, and therefore reduce the need for mitochondria to switch tracks during transport. Such enhanced interaction between microtubules and motor protein might explain the extended

episodes of motility that we observed in our experiments. By fractionating cytoplasmic extracts of tubacin-treated cultures, we found that greater amounts of acetylated tubulin and kinesin-1 were associated with mitochondria following exposure to tubacin. Since kinesin-1 is not an exclusively mitochondrial motor protein, it is likely that the observed effect of increased acetylation of microtubules on mitochondrial movement produced by inhibiting HDAC6 is a reflection of a more general promotion of intracellular cytoplasmic trafficking within neurons. Consistent with this idea, it was recently reported that inhibition of HDAC6 produced a higher transfection efficiency by enhancing intracellular transport of transfected plasmids [22].

### Is tubulin deacetylation the only way in which HDAC6 regulates mitochondrial trafficking?

In addition to tubulin, HDAC6 is associated with many other proteins [1]. At present, it is not certain whether other substrates of HDAC6 are involved in the enhancement of mitochondrial trafficking that we have observed. Under pathological circumstances, the effect of HDAC6 on the degradation of misfolded-protein may also be involved in mitochondrial trafficking. HDAC6 has been found in aggresomes containing dynein and other proteins [23]. The formation of aggresomes might play a role in mitochondrial movement regulated by HDAC6. Indeed, it was recently reported that protein trafficking of both Parkin and DJ-1 aggresomes were directly involved in HDAC6 inhibition [24,25]. Moreover, the cdc20-APC aggresome complex was also shown to be involved in direct binding to HDAC6, as well as neuronal dendritic morphogenesis [26]. Taken together, the foregoing suggests that protein degradation might play a role in the regulation of intracellular trafficking. The intricate relationship between HDAC6-related protein degradation and mitochondrial trafficking merits further study.

In a recent genome-wide RNAi screen of *Drosophila melanogaster*, HDAC6 was identified as a modulator of mitochondrial function, suggesting not only that it may exert a major influence on mitochondrial trafficking, but also that it may have a profound effect on overall mitochondrial function [27].

### The function of HDAC6 phosphorylation

Using a phosphoepitope-specific antibody, we showed that phosphorylation of HDAC6 at serine-22, which conforms to the consensus site for GSK3 $\beta$  phosphorylation, was reduced by modulating GSK3 $\beta$  activity (Fig. 5H–J). This suggests that GSK3 $\beta$  may directly phosphorylate HDAC6 at this site, although further work with purified proteins is needed to determine whether this is the case. Since some other kinases share the same consensus phosphorylation site with GSK3 $\beta$ —for example cdk5 and p38—HDAC6 may also be simultaneously regulated by other kinases via phosphorylation of serine-22.

We observed that inhibiting GSK3 $\beta$  decreased overall deacetylase activity in cytoplasmic extracts of hippocampal neurons, but not in the corresponding nuclear fractions, suggesting that the effect is quite specific (Fig. 4B). The fact that HDAC6 is the predominant cytoplasmic deacetylase in neurons [1] suggests that GSK3 $\beta$ -dependent phosphorylation may enhance HDAC6 activ-

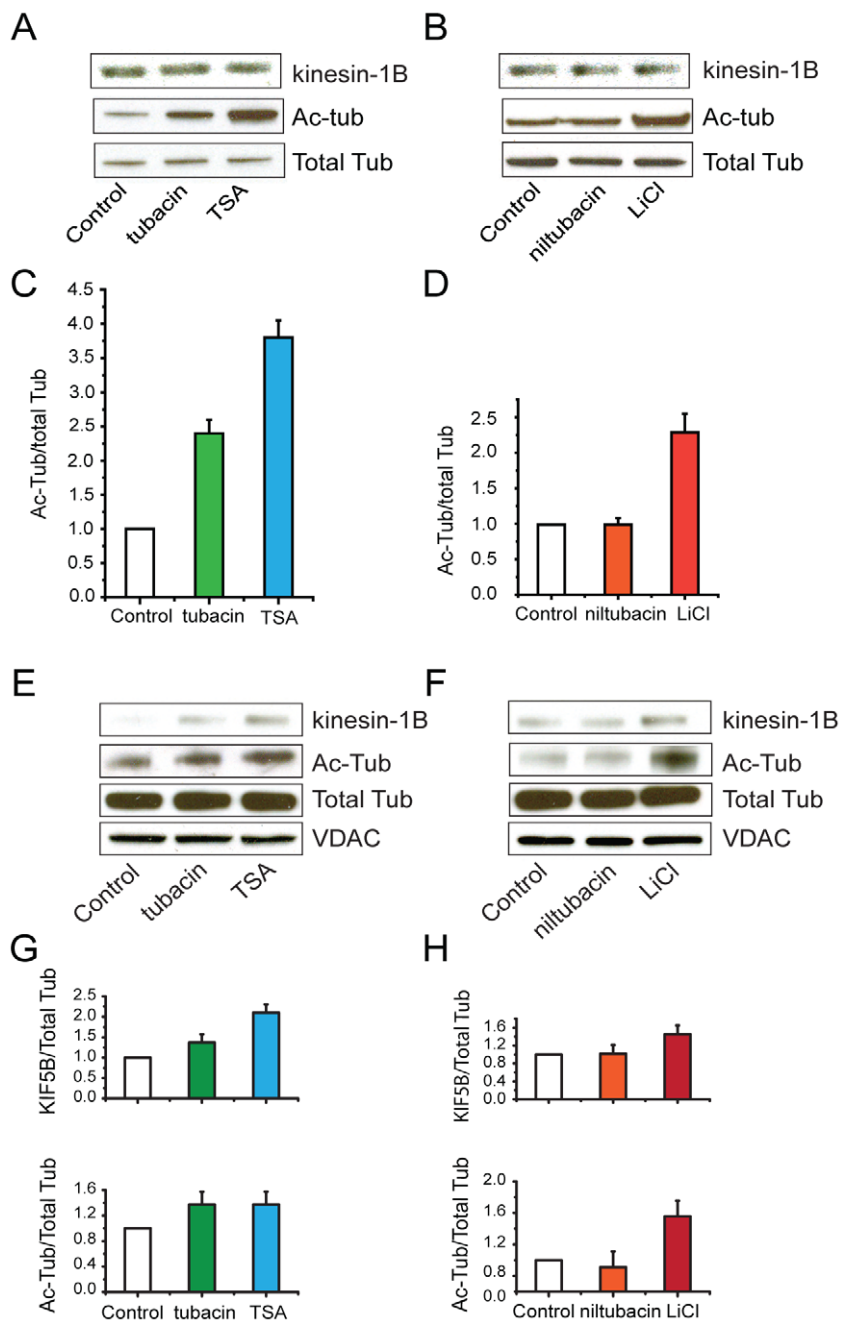

**Figure 2. Changes in tubulin acetylation and association of kinesin-1B with mitochondria occur following treatment with tubacin, TSA, or LiCl.** A. Western blot analysis of kinesin-1B and acetylated tubulin levels in total cell lysates from hippocampal neuronal cultures that were treated with tubacin (20  $\mu$ M) or TSA (10  $\mu$ M) for one hour. B. Western blot analysis of kinesin-1B and acetylated tubulin levels in total cell lysates from hippocampal neuronal cultures that were treated with niltubacin (20  $\mu$ M) or LiCl (10 mM) for one hour. C. Quantification of Western blot results shown in A (n=3). D. Quantification of Western blot results shown in B (n=3). E. Western blot analysis of kinesin-1B and acetylated tubulin protein levels in a mitochondrial fraction isolated from hippocampal neuronal cultures that were treated with tubacin (20  $\mu$ M) or TSA (10  $\mu$ M) for one hour. F. Western blot analysis of kinesin-1B and acetylated tubulin protein levels in a mitochondrial fraction from hippocampal neuronal cultures that were treated with niltubacin (20  $\mu$ M) or LiCl (10 mM) for one hour. G. Quantification of Western blot results shown in E (n=3). H. Quantification of Western blot results shown in F (n=3). Mitochondrial protein levels were normalized to voltage-dependent anion channel (VDAC) protein levels. doi:10.1371/journal.pone.0010848.g002

ity, resulting in a decrease in acetylation of tubulin and an inhibition of both mitochondrial motility and the transport of other kinesin-1 dependent cargoes. Conversely, the activation of Akt—for example, by exposure to serotonin with consequent phosphorylation and inhibition of GSK3 $\beta$ —would lead to a

decrease in HDAC6 activity, higher levels of tubulin acetylation, and increased movement of mitochondria.

Kinesins bind to various cargoes via several different adaptor proteins [28]. Kinesin light chains comprise an important class of adaptor proteins that associate with kinesin-1, and mediate fast

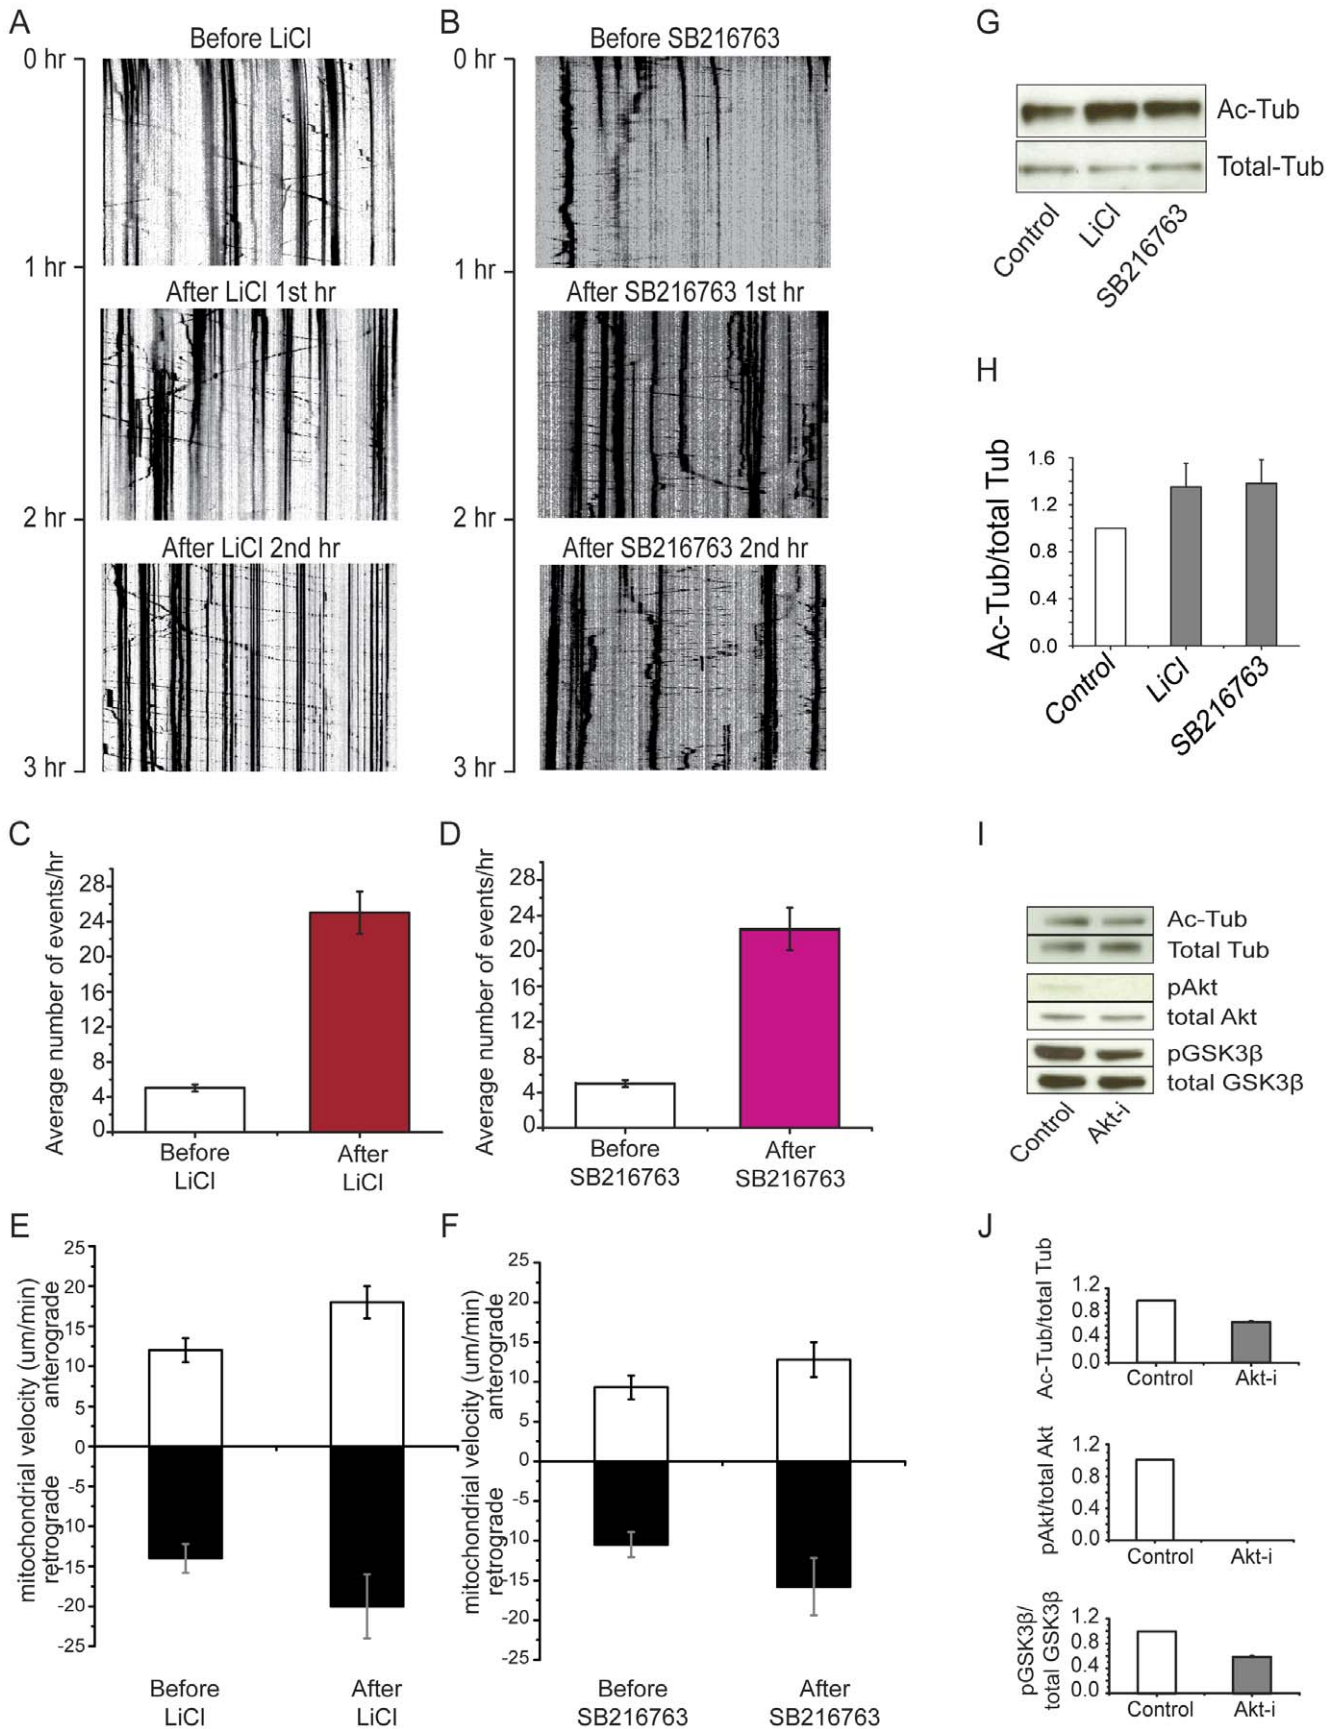

**Figure 3. GSK3 $\beta$  activity regulates both mitochondrial movement and tubulin acetylation.** Inhibition of GSK3 $\beta$  by LiCl or SB216763 promotes mitochondrial movement and increases levels of acetylated tubulin, whereas activation of GSK3 $\beta$  via inhibition of Akt decreases levels of acetylated tubulin in hippocampal neurons. Kymographs (A and B) of mitochondrial motility correspond to Movies S10, S11, S12 and S13, S14, S15 respectively. In the experiment, a segment of axon was imaged continuously for 3 hours with short break to administer drugs. Images were acquired at 10-second intervals. A. Treatment with LiCl. B. Treatment with SB216763. C and D. Quantification of the numbers of moving mitochondria during the period of observation (n=5). Only mitochondria that moved through the entire field of view were calculated. E and F. Quantification of mean velocities of moving mitochondria (n=5). G. Western blot analysis of acetylated tubulin in extracts from hippocampal neurons that were treated with LiCl or SB216763. H. Quantification of Western blot shown in G. I. Western blot analysis of acetylated tubulin, phosphorylated Akt (pAkt), and phosphorylated GSK3 $\beta$  (pGSK3 $\beta$ ) in extracts from hippocampal neurons that were treated with Akt inhibitor. J. Quantification of Western blot shown in I.

doi:10.1371/journal.pone.0010848.g003

axonal transport [29]. It has been shown that GSK3 $\beta$  phosphorylates kinesin light chain 2 (KLC2), and negatively regulates anterograde axonal transport [20]. In the present work, we did not detect KLC1 nor KLC2, the major KLCs [30], in fractions of mitochondria isolated from hippocampal neurons. Work by others has indicated that KLCs may not be the predominant adaptor protein that links kinesin-1 to mitochondria [31,32,33,34]. In *Drosophila*, the proteins Milton and dMiro are critical to transport of mitochondria in neurons, and mammalian homologues of these proteins (GRIF-1 and Miro1) have been shown mediate transport of mitochondria [34]. Moreover, in a recent study of the transport of Na, K-ATPase-containing vesicles, mitochondrial motility was not affected by knock-down of KLC2 by shRNA [35]. These observations are consistent with the idea that GSK3 $\beta$  regulates mitochondrial transport by acting through HDAC6, independent of KLCs.

#### Potential implications for disease and therapy

The present study suggests that GSK3 $\beta$  inhibition and HDAC6 activity are closely linked. A number of anti-depressant medications act directly or indirectly to block GSK3 $\beta$  activity. For example, LiCl is known to inhibit GSK3 $\beta$ , and we have previously shown that the selective serotonin reuptake inhibitor, fluoxetine, decreases GSK3 $\beta$  activity by upregulating Akt [12]. It is

conceivable that these drugs ultimately act to counter depression via a common downstream mechanism: namely the modulation of HDAC6 activity. The regulation of HDAC6 would affect intracellular trafficking of both organelles and proteins in neurons through changes in levels of acetylated tubulin. It is important to note that HDAC6 is also involved in other important cellular processes, serving in some instances as a stress response 'central node' [36] and in others as a cellular redox state sensor [37]. In any case, many of the molecular effects of HDAC6 impact the structure and function of microtubules and actin filaments, both of which are critical to intracellular trafficking.

It was reported recently that HDAC6 exhibits increased activity in cerebral cortex and hippocampus of Alzheimer's disease patients [38]. This finding is consonant with the observed reduction of acetylated tubulin in affected neurons from Alzheimer's disease patients [10], and may further strengthen the link between mitochondrial movement and this disorder. Given these observations, it is possible that the reported perturbation of mitochondrial transport associated with Alzheimer's disease is caused by an elevated level of HDAC6 and a consequent alteration of the cellular trafficking machinery. Moreover, it is possible that, in Alzheimer's disease, aberrant HDAC6 levels are induced by increased activity of GSK3 $\beta$  [39]. The present study not only supports the importance of GSK3

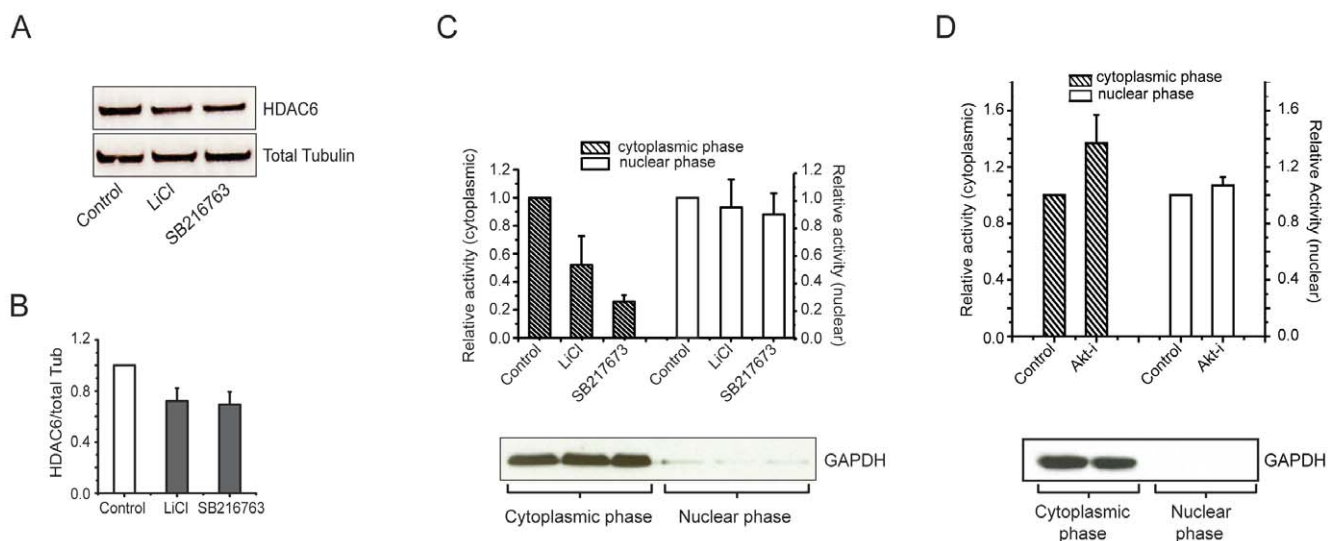

doi:10.1371/journal.pone.0010848.g004

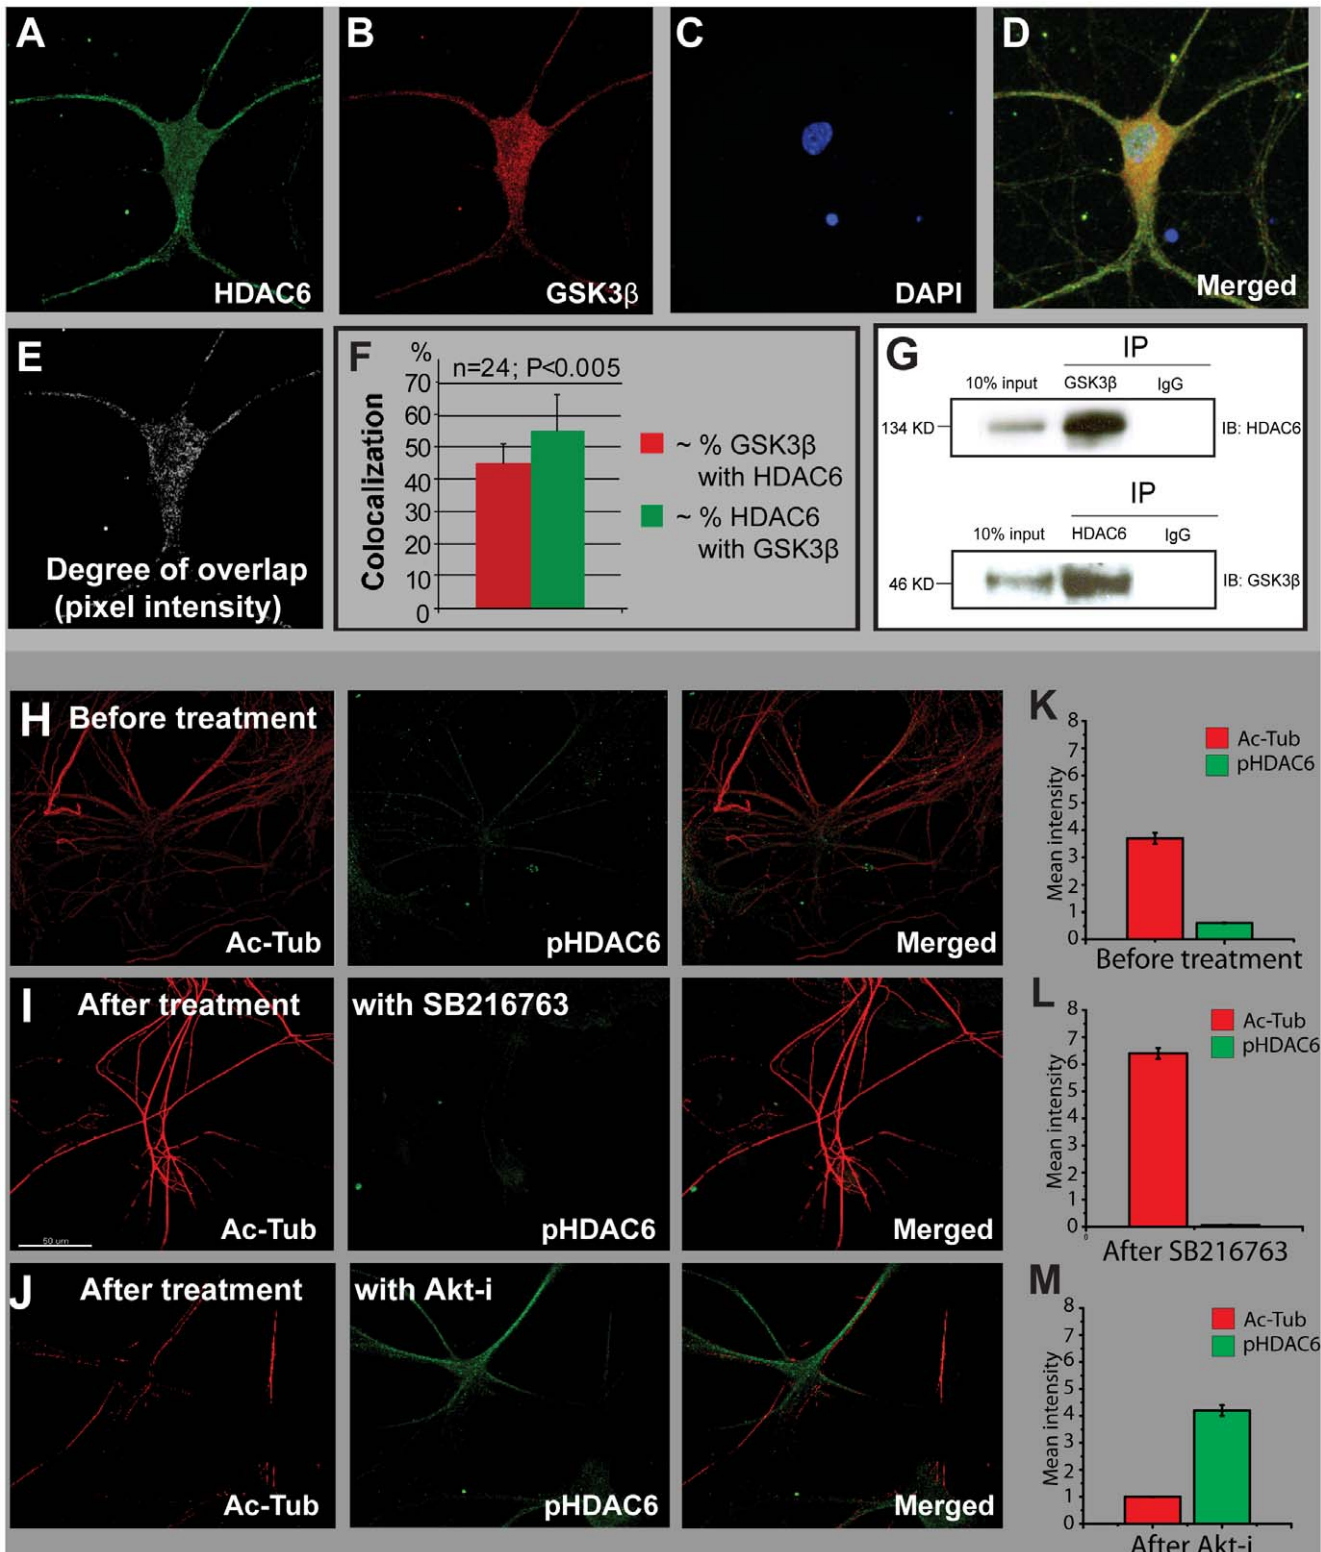

**Figure 5. HDAC6 and GSK3β are co-localized in hippocampal neurons; HDAC6 serine-22 phosphorylation levels are modulated by GSK3β.** A–F. Immunostaining of HDAC6 and GSK3β in hippocampal neurons. F. Plot of co-localization generated from confocal image data collected from four neurons (six Z levels per cell; total sample size ~24). G. Immunoprecipitation of GSK3β and HDAC6, respectively. H–J. Confocal images of immunostained acetylated tubulin and phosphorylated HDAC6 (anti-phosphoserine 22) in hippocampal neurons. H. Before treatment. I. After treatment with SB216763. J. After treatment with Akt inhibitor VIII (5 μM). K, L and M. Quantification of images H–J. Mean values of relative pixel intensities are shown. doi:10.1371/journal.pone.0010848.g005



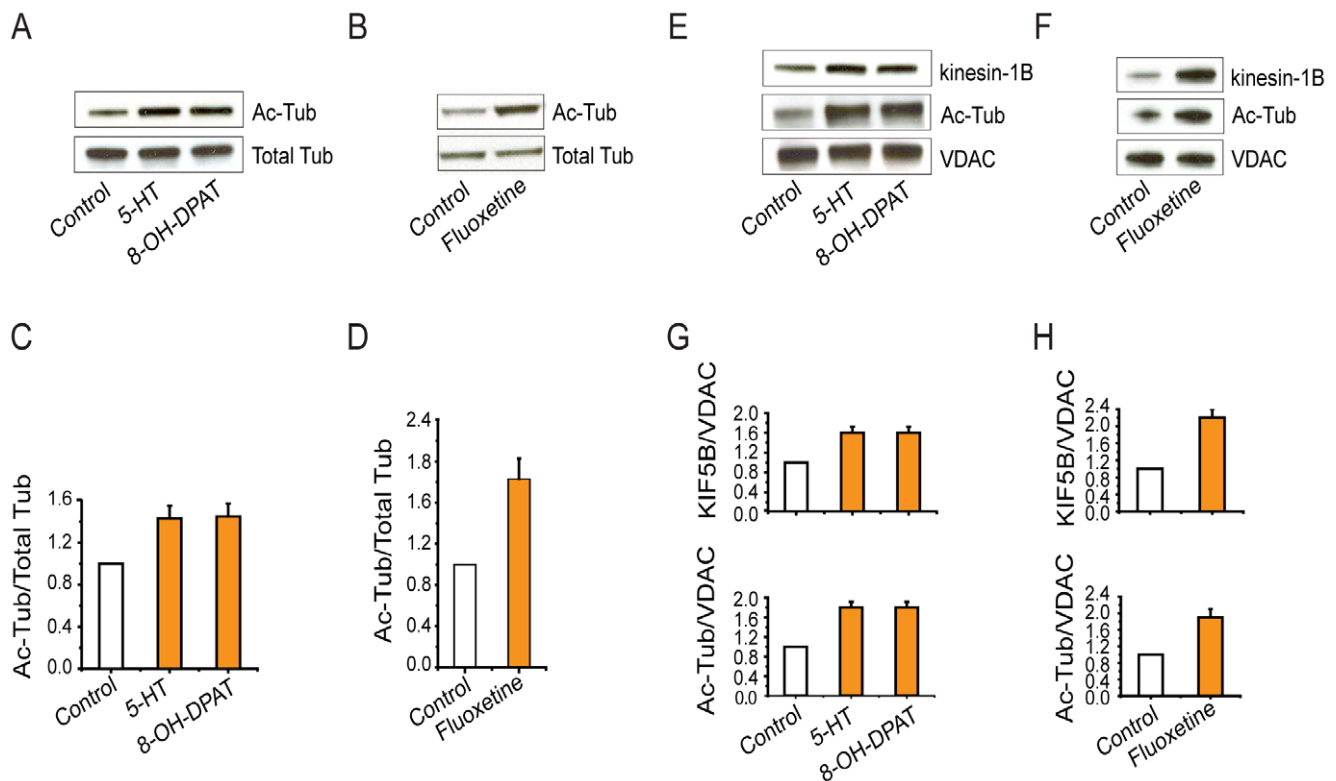

**Figure 6. 5-HT signals increase levels of Kinesin-1B and acetylated tubulin in mitochondrial fractions isolated from hippocampal neurons.** A, C. 5-HT or 8-OH-DPAT increases acetylation of tubulin in hippocampal neurons. B, D. Fluoxetine increases acetylation of tubulin in hippocampal neurons. E, F, G, H. 5-HT, 8-OH-DPAT, or fluoxetine increase the amount of kinesin1-B (top panel) and acetylated tubulin (bottom panel) found in a mitochondrially-enriched fraction. Mitochondrial protein levels were normalized to VDAC. Quantifications of Western blots were based on multiple experiments ( $n \geq 3$ ).

doi:10.1371/journal.pone.0010848.g006

kinases (including GSK3 $\alpha$  and GSK3 $\beta$ ) as critical nodes in the progression of Alzheimer's disease [40], but also emphasizes the central role of GSK3 in regulating intracellular trafficking [41,42,43].

## Materials and Methods

### Primary cell culture and infection of cell culture

Preparation of hippocampal neuronal cultures and infection with the MitoTurboRFP lentivirus were as previously described [12,13].

### Live cell imaging and image analysis

To provide life support for primary neuronal cultures during extended imaging sessions, we used a microscope stage-top incubator that we designed and built to enclose a 35 mm glass-bottom culture dish. The stage-top incubator chamber is connected, through a closed circuit of silicon hoses, to a Forma Model 3154 water-jacketed incubator (Thermo Fisher Scientific, Inc., Waltham, MA) that supplies an atmosphere of 90% air/10% CO<sub>2</sub>. Ambient air and stage temperatures are maintained at 37°C via thermostat-controlled resistors mounted both inside the stage-top incubator chamber and on its aluminum base. Fluorescence microscopy was used to observe axonal transport of MitoTurboRed-labeled mitochondria in live hippocampal neurons. Time-lapse image series were acquired under high magnification (63 $\times$  PLAN APO oil immersion objective; numerical aperture = 1.32; Leica, GmbH, Germany) using a Leica DMI-6000B inverted

fluorescence microscope (Leica GmbH, Germany) equipped with a Sutter Lamda 10-2 emission filter wheel, Sutter DG-4 xenon light source (Sutter Instruments, Novato, CA), and a Cooke Sensiscam qe<sup>TM</sup> cooled CCD camera (Cooke Corporation, Romulus, MI). Microscope control and image capture and analysis were accomplished using the Slidebook<sup>TM</sup> image acquisition and analysis software package (Intelligent Imaging Innovations, Inc., Denver, CO). In each imaging session, individual frames of mitochondria within an axon segment were acquired every 10 seconds (except where noted) for a total recording time of one hour. Kymographs were generated by the 'smooth curve analysis' module in Slidebook<sup>TM</sup>. Confocal images were acquired with a Zeiss LSM 710 laser confocal microscope (Karl Zeiss, Microimaging, GmbH, Germany). Confocal data was analyzed using Imaris software package (Bitplane Inc., Saint Paul, MN).

### Immunocytochemical staining and reagents

Details of immunostaining protocols used in the present study can be found in a previous publication [13]. HDAC6 antibodies were purchased from Abcam (Cambridge, MA), Santa Cruz Biotechnology (Santa Cruz, CA), and Cell Signaling (Denver, MA). GSK3 $\beta$  antibodies were purchased from Cell Signaling (Denver, MA). Acetylated tubulin antibodies were purchased from Sigma (St. Louis, MO). Tubacin and niltubacin were kindly provided by Dr. Stuart Schreiber of Harvard University. Akt inhibitor VIII was purchased from Calbiochem (La Jolla, CA). All

other chemicals were purchased from Sigma-Aldrich (St. Louis, MO) if not otherwise specified.

### Western blotting

Details of the Western blot protocol used in the present study can be found in a previous publication [13].

### Isolation of mitochondria

Mitochondrial fractions were isolated from rat hippocampal neuronal cultures following the 'sucrose gradient separation protocol' developed by Mitosciences, Inc. (Eugene, OR).

### Activity assay of HDAC6

Basic procedures were performed according to product instructions included with the HDAC activity fluorometric assay kit used (Biomol, Plymouth Meeting, PA). When samples were detected, the wavelength of excitation was 460 nm and the detected wavelength of emission was 360 nm (gain = 850). In the assay for HDAC6 activity, protein extracts from whole cell lysates of hippocampal neurons were separated into cytoplasmic and nuclear phases using a corresponding product from Pierce (Rockford, IL).

### Supporting Information

**Figure S1** Kinesin light chains (KLCs) do not copurify with mitochondria isolated from hippocampal neurons. Western blot analysis of lysates and mitochondrial fractions from 5-HT-treated and control cultures. Protein extracts were probed with kinesin-1B, kinesin light chain 1 (KLC1), kinesin light chain 2 (KLC2) and  $\beta$ -actin antibodies.

Found at: doi:10.1371/journal.pone.0010848.s001 (0.16 MB TIF)

**Movie S1** Mitochondrial motility before treatment with tubacin. Time-lapse series showing motility of MitoTurboRFP-labeled mitochondria in cultured hippocampal neurons for one hour before administration of tubacin.

Found at: doi:10.1371/journal.pone.0010848.s002 (3.00 MB MOV)

**Movie S2** Mitochondrial motility after treatment with tubacin. Time-lapse series showing motility of MitoTurboRFP-labeled mitochondria in cultured hippocampal neurons for first hour after administration of tubacin.

Found at: doi:10.1371/journal.pone.0010848.s003 (3.11 MB MOV)

**Movie S3** Mitochondrial motility after treatment with tubacin. Time-lapse series showing motility of MitoTurboRFP-labeled mitochondria in cultured hippocampal neurons for second hour after administration of tubacin.

Found at: doi:10.1371/journal.pone.0010848.s004 (3.19 MB MOV)

**Movie S4** Mitochondrial motility before treatment with TSA. Time-lapse series showing motility of MitoTurboRFP-labeled mitochondria in cultured hippocampal neurons for one hour before administration of TSA.

Found at: doi:10.1371/journal.pone.0010848.s005 (0.66 MB MOV)

**Movie S5** Mitochondrial motility after treatment with TSA. Time-lapse series showing motility of MitoTurboRFP-labeled mitochondria in cultured hippocampal neurons for first hour after administration of TSA.

Found at: doi:10.1371/journal.pone.0010848.s006 (2.96 MB MOV)

**Movie S6** Mitochondrial motility after treatment with TSA. Time-lapse series showing motility of MitoTurboRFP-labeled mitochondria in cultured hippocampal neurons for second hour after administration of TSA.

Found at: doi:10.1371/journal.pone.0010848.s007 (0.75 MB MOV)

**Movie S7** Mitochondrial motility before treatment with niltubacin. Time-lapse series showing motility of MitoTurboRFP-labeled mitochondria in cultured hippocampal neurons for one hour before administration of niltubacin.

Found at: doi:10.1371/journal.pone.0010848.s008 (1.98 MB MOV)

**Movie S8** Mitochondrial motility after treatment with niltubacin. Time-lapse series showing motility of MitoTurboRFP-labeled mitochondria in cultured hippocampal neurons for first hour after administration of niltubacin.

Found at: doi:10.1371/journal.pone.0010848.s009 (1.34 MB MOV)

**Movie S9** Mitochondrial motility after treatment with niltubacin. Time-lapse series showing motility of MitoTurboRFP-labeled mitochondria in cultured hippocampal neurons for second hour after administration of niltubacin.

Found at: doi:10.1371/journal.pone.0010848.s010 (1.01 MB MOV)

**Movie S10** Mitochondrial motility before treatment with LiCl. Time-lapse series showing motility of MitoTurboRFP-labeled mitochondria in cultured hippocampal neurons for one hour before administration of LiCl.

Found at: doi:10.1371/journal.pone.0010848.s011 (1.29 MB MOV)

**Movie S11** Mitochondrial motility after treatment with LiCl. Time-lapse series showing motility of MitoTurboRFP-labeled mitochondria in cultured hippocampal neurons for first hour after administration of LiCl.

Found at: doi:10.1371/journal.pone.0010848.s012 (1.29 MB MOV)

**Movie S12** Mitochondrial motility after treatment with LiCl. Time-lapse series showing motility of MitoTurboRFP-labeled mitochondria in cultured hippocampal neurons for second hour after administration of LiCl.

Found at: doi:10.1371/journal.pone.0010848.s013 (1.76 MB MOV)

**Movie S13** Mitochondrial motility before treatment with SB216763. Time-lapse series showing motility of MitoTurboRFP-labeled mitochondria in cultured hippocampal neurons for one hour before administration of SB216763.

Found at: doi:10.1371/journal.pone.0010848.s014 (1.21 MB MOV)

**Movie S14** Mitochondrial motility after treatment with SB216763. Time-lapse series showing motility of MitoTurboRFP-labeled mitochondria in cultured hippocampal neurons for first hour after administration of SB216763.

Found at: doi:10.1371/journal.pone.0010848.s015 (1.76 MB MOV)

**Movie S15** Time-lapse series showing motility of MitoTurboRFP-labeled mitochondria in cultured hippocampal neurons for second hour after administration of SB216763.

Found at: doi:10.1371/journal.pone.0010848.s016 (2.57 MB MOV)

## Acknowledgments

We thank Dr. Stuart L. Schreiber and Dr. Ralph Mazitschek, who are supported by ICG (Initiative for Chemical Genetics–National Cancer Institute), for providing tubacin and niltubacin. We are also grateful to Drs. Gerald Edelman and Joseph Gally for their critical reading of the manuscript, as well as for their helpful suggestions during the course of our

research. Finally, we would like to thank Ayda Dashtaei for invaluable technical assistance with tissue culture.

## Author Contributions

Conceived and designed the experiments: SC GCO DBE. Performed the experiments: SC HM. Analyzed the data: SC HM. Wrote the paper: SC GCO DBE.

## References

- Valenzuela-Fernandez A, Cabrero JR, Serrador JM, Sanchez-Madrid F (2008) HDAC6: a key regulator of cytoskeleton, cell migration and cell-cell interactions. *Trends Cell Biol* 18: 291–297.
- Hubbert C, Guardiola A, Shao R, Kawaguchi Y, Ito A, et al. (2002) HDAC6 is a microtubule-associated deacetylase. *Nature* 417: 455–458.
- Zhang Y, Li N, Caron C, Matthias G, Hess D, et al. (2003) HDAC-6 interacts with and deacetylates tubulin and microtubules in vivo. *Embo J* 22: 1168–1179.
- Reed NA, Cai D, Blasius TL, Jih GT, Meyhofer E, et al. (2006) Microtubule acetylation promotes kinesin-1 binding and transport. *Curr Biol* 16: 2166–2172.
- Dompierre JP, Godin JD, Charrin BC, Cordelieres FP, King SJ, et al. (2007) Histone deacetylase 6 inhibition compensates for the transport deficit in Huntington's disease by increasing tubulin acetylation. *J Neurosci* 27: 3571–3583.
- Hollenbeck PJ, Saxton WM (2005) The axonal transport of mitochondria. *J Cell Sci* 118: 5411–5419.
- Reynolds IJ, Malaiyandi LM, Coash M, Rintoul GL (2004) Mitochondrial trafficking in neurons: a key variable in neurodegeneration? *J Bioenerg Biomembr* 36: 283–286.
- Trimmer PA, Borland MK (2005) Differentiated Alzheimer's disease trans-mitochondrial cybrid cell lines exhibit reduced organelle movement. *Antioxid Redox Signal* 7: 1101–1109.
- Beal MF (2007) Mitochondria and neurodegeneration. *Novartis Found Symp* 287: 183–192; discussion 192–186.
- Hempen B, Brion JP (1996) Reduction of acetylated alpha-tubulin immunoreactivity in neurofibrillary tangle-bearing neurons in Alzheimer's disease. *J Neuropathol Exp Neurol* 55: 964–972.
- Bendiske J, Caba E, Brown QB, Bahr BA (2002) Intracellular deposition, microtubule destabilization, and transport failure: an "early" pathogenic cascade leading to synaptic decline. *J Neuropathol Exp Neurol* 61: 640–650.
- Chen S, Owens GC, Crossin KL, Edelman DB (2007) Serotonin stimulates mitochondrial transport in hippocampal neurons. *Mol Cell Neurosci* 36: 472–483.
- Chen S, Owens GC, Edelman DB (2008) Dopamine inhibits mitochondrial motility in hippocampal neurons. *PLoS ONE* 3: e2804.
- Haggarty SJ, Koeller KM, Wong JC, Grozinger CM, Schreiber SL (2003) Domain-selective small-molecule inhibitor of histone deacetylase 6 (HDAC6)-mediated tubulin deacetylation. *Proc Natl Acad Sci U S A* 100: 4389–4394.
- Carre M, Andre N, Carles G, Borghi H, Brichese L, et al. (2002) Tubulin is an inherent component of mitochondrial membranes that interacts with the voltage-dependent anion channel. *J Biol Chem* 277: 33664–33669.
- Jope RS, Johnson GV (2004) The glamour and gloom of glycogen synthase kinase-3. *Trends Biochem Sci* 29: 95–102.
- Southwood CM, Peppi M, Dryden S, Tainsky MA, Gow A (2007) Microtubule deacetylases, SirT2 and HDAC6, in the nervous system. *Neurochem Res* 32: 187–195.
- Linding R, Jensen LJ, Ostheimer GJ, van Vugt MA, Jorgensen C, et al. (2007) Systematic discovery of in vivo phosphorylation networks. *Cell* 129: 1415–1426.
- Brush MH, Guardiola A, Connor JH, Yao TP, Shenolikar S (2004) Deacetylase inhibitors disrupt cellular complexes containing protein phosphatases and deacetylases. *J Biol Chem* 279: 7685–7691.
- Morfini G, Szebenyi G, Elluru R, Ratner N, Brady ST (2002) Glycogen synthase kinase 3 phosphorylates kinesin light chains and negatively regulates kinesin-based motility. *EMBO J* 21: 281–293.
- Bulinski JC (2007) Microtubule modification: acetylation speeds anterograde traffic flow. *Curr Biol* 17: R18–20.
- Vaughan EE, Geiger RC, Miller AM, Loh-Marley PL, Suzuki T, et al. (2008) Microtubule acetylation through HDAC6 inhibition results in increased transfection efficiency. *Mol Ther* 16: 1841–1847.
- Kawaguchi Y, Kovacs JJ, McLaurin A, Vance JM, Ito A, et al. (2003) The deacetylase HDAC6 regulates aggresome formation and cell viability in response to misfolded protein stress. *Cell* 115: 727–738.
- Oltmann JA, Li L, Chudav MV, Chen J, Perez FA, et al. (2007) Parkin-mediated K63-linked polyubiquitination targets misfolded DJ-1 to aggresomes via binding to HDAC6. *J Cell Biol* 178: 1025–1038.
- Jiang Q, Ren Y, Feng J (2008) Direct binding with histone deacetylase 6 mediates the reversible recruitment of parkin to the centrosome. *J Neurosci* 28: 12993–13002.
- Kim AH, Puram SV, Bilimoria PM, Ikeuchi Y, Keough S, et al. (2009) A centrosomal Cdc20-APC pathway controls dendrite morphogenesis in postmitotic neurons. *Cell* 136: 322–336.
- Chen J, Shi X, Padmanabhan R, Wang Q, Wu Z, et al. (2008) Identification of novel modulators of mitochondrial function by a genome-wide RNAi screen in *Drosophila melanogaster*. *Genome Res* 18: 123–136.
- Schlager MA, Hoogenraad CC (2009) Basic mechanisms for recognition and transport of synaptic cargos. *Mol Brain* 2: 25.
- Wozniak MJ, Allan VJ (2006) Cargo selection by specific kinesin light chain 1 isoforms. *EMBO J* 25: 5457–5468.
- Rahman A, Kamal A, Roberts EA, Goldstein LS (1999) Defective kinesin heavy chain behavior in mouse kinesin light chain mutants. *J Cell Biol* 146: 1277–1288.
- Glater EE, Megeath LJ, Stowers RS, Schwarz TL (2006) Axonal transport of mitochondria requires milton to recruit kinesin heavy chain and is light chain independent. *J Cell Biol* 173: 545–557.
- Palacios IM, St Johnston D (2002) Kinesin light chain-independent function of the Kinesin heavy chain in cytoplasmic streaming and posterior localisation in the *Drosophila* oocyte. *Development* 129: 5473–5485.
- Rice SE, Gelfand VI (2006) Paradigm lost: milton connects kinesin heavy chain to miro on mitochondria. *J Cell Biol* 173: 459–461.
- MacAskill AF, Brickley K, Stephenson FA, Kittler JT (2009) GTPase dependent recruitment of Grif-1 by Miro1 regulates mitochondrial trafficking in hippocampal neurons. *Mol Cell Neurosci* 40: 301–312.
- Trejo HE, Lecuona E, Grillo D, Szeleifer I, Nekrasova OE, et al. (2010) Role of kinesin light chain-2 of kinesin-1 in the traffic of Na,K-ATPase-containing vesicles in alveolar epithelial cells. *FASEB J* 24: 374–382.
- Matthias P, Yoshida M, Khochbin S (2008) HDAC6 a new cellular stress surveillance factor. *Cell Cycle* 7: 7–10.
- Parmigiani RB, Xu WS, Venta-Perez G, Erdjument-Bromage H, Yaneva M, et al. (2008) HDAC6 is a specific deacetylase of peroxiredoxins and is involved in redox regulation. *Proc Natl Acad Sci U S A* 105: 9633–9638.
- Ding H, Dolan PJ, Johnson GV (2008) Histone deacetylase 6 interacts with the microtubule-associated protein tau. *J Neurochem*.
- Leroy K, Yilmaz Z, Brion JP (2007) Increased level of active GSK-3beta in Alzheimer's disease and accumulation in argyrophilic grains and in neurones at different stages of neurofibrillary degeneration. *Neuropathol Appl Neurobiol* 33: 43–55.
- Hooper C, Killick R, Lovestone S (2008) The GSK3 hypothesis of Alzheimer's disease. *J Neurochem* 104: 1433–1439.
- Morfini G, Pignino G, Belfert U, Busciglio J, Brady ST (2002) Fast axonal transport misregulation and Alzheimer's disease. *Neuromolecular Med* 2: 89–99.
- Pignino G, Morfina G, Pelsman A, Mattson MP, Brady ST, et al. (2003) Alzheimer's presenilin 1 mutations impair kinesin-based axonal transport. *J Neurosci* 23: 4499–4508.
- LaPointe NE, Morfina G, Pignino G, Gaisina IN, Kozikowski AP, et al. (2009) The amino terminus of tau inhibits kinesin-dependent axonal transport: implications for filament toxicity. *J Neurosci Res* 87: 440–451.
